# Supplementary material for: Mutational signatures of complex genomic rearrangements in human cancer
Source: bioRxiv preprint, doi:10.1101/2021.05.16.444385, version 1 (2021-05-17)
Supplement: Supplementary Table 2 [file 444385_file11.xlsx]

## Sheet: 2015_micronuclei_connected_CGR_
event_id	chr	start	end	CGR_status	link_chromosome	sample	CGR_signature	study
MN_SI_140612_P4_H4_2_3	2	62520951	62521071	link	2_3	MN_SI_140612_P4_H4	3 Large loss	Zhang et al. 2015 Micronuclei
MN_SI_140612_P4_H4_2_3	3	2924894	175824214	cgr	2_3	MN_SI_140612_P4_H4	3 Large loss	Zhang et al. 2015 Micronuclei
MN_SI_140612_P8_C4_4_11	11	2761602	132938211	link	4_11	MN_SI_140612_P8_C4	4 Micronuclei	Zhang et al. 2015 Micronuclei
MN_SI_140612_P8_C4_4_11	4	17244986	186661717	cgr	4_11	MN_SI_140612_P8_C4	4 Micronuclei	Zhang et al. 2015 Micronuclei
MN_SI_140617_P3_I5_3_14	14	45200384	48053039	link	3_14	MN_SI_140617_P3_I5	4 Micronuclei	Zhang et al. 2015 Micronuclei
MN_SI_140617_P3_I5_3_14	3	420079	197829641	cgr	3_14	MN_SI_140617_P3_I5	4 Micronuclei	Zhang et al. 2015 Micronuclei
MN_SI_140121_P1_F10_1	1	3931134	234602416	cgr	1	MN_SI_140121_P1_F10	4 Micronuclei	Zhang et al. 2015 Micronuclei
MN_SI_140122_P7_E7_1	1	179903377	231390700	cgr	1	MN_SI_140122_P7_E7	5 Large gain	Zhang et al. 2015 Micronuclei
MN_SI_140609_P9_E4_8	8	1841810	129000724	cgr	8	MN_SI_140609_P9_E4	4 Micronuclei	Zhang et al. 2015 Micronuclei
MN_SI_140612_P4_H5_3	3	10934117	186428008	cgr	3	MN_SI_140612_P4_H5	2 BFB cycles/chromatin bridge	Zhang et al. 2015 Micronuclei
RPE1-hTERT_X-29_11	11	58799938	60676854	cgr	11	RPE1-hTERT_X-29	2 BFB cycles/chromatin bridge	Maciejowski et al. 2015 Chromatin bridge
RPE1-hTERT_X-33_8	8	72865629	121462008	cgr	8	RPE1-hTERT_X-33	2 BFB cycles/chromatin bridge	Maciejowski et al. 2015 Chromatin bridge
RPE1-hTERT_X-37_15	15	92172092	101243620	cgr	15	RPE1-hTERT_X-37	6 Hourglass	Maciejowski et al. 2015 Chromatin bridge
MN_SI_160615_P2_J12_1_2	1	3963034	246647008	cgr	1_2	MN_SI_160615_P2_J12	4 Micronuclei	Umbreit et al. 2020 Micronuclei
MN_SI_160615_P2_J12_1_2	2	973023	235075509	cgr	1_2	MN_SI_160615_P2_J12	4 Micronuclei	Umbreit et al. 2020 Micronuclei
MN_SI_160615_P3_C4_4_5_6_12	12	2070303	132923370	cgr	4_5_6_12	MN_SI_160615_P3_C4	2 BFB cycles/chromatin bridge	Umbreit et al. 2020 Micronuclei
MN_SI_160615_P3_C4_4_5_6_12	4	147965060	147967046	link	4_5_6_12	MN_SI_160615_P3_C4	2 BFB cycles/chromatin bridge	Umbreit et al. 2020 Micronuclei
MN_SI_160615_P3_C4_4_5_6_12	5	50535196	180146293	cgr	4_5_6_12	MN_SI_160615_P3_C4	2 BFB cycles/chromatin bridge	Umbreit et al. 2020 Micronuclei
MN_SI_160615_P3_C4_4_5_6_12	6	1717802	167267208	cgr	4_5_6_12	MN_SI_160615_P3_C4	2 BFB cycles/chromatin bridge	Umbreit et al. 2020 Micronuclei
MN_SI_160615_P3_E21_5_6_12	12	479041	132736209	cgr	5_6_12	MN_SI_160615_P3_E21	4 Micronuclei	Umbreit et al. 2020 Micronuclei
MN_SI_160615_P3_E21_5_6_12	5	50616068	178430192	cgr	5_6_12	MN_SI_160615_P3_E21	4 Micronuclei	Umbreit et al. 2020 Micronuclei
MN_SI_160615_P3_E21_5_6_12	6	1159205	167263257	cgr	5_6_12	MN_SI_160615_P3_E21	4 Micronuclei	Umbreit et al. 2020 Micronuclei
MN_SI_180527_S1_8_2_10_11_22_X	10	3218951	121349729	link	2_10_11_22_X	MN_SI_180527_S1_8	2 BFB cycles/chromatin bridge	Umbreit et al. 2020 Micronuclei
MN_SI_180527_S1_8_2_10_11_22_X	11	36620794	85086708	link	2_10_11_22_X	MN_SI_180527_S1_8	2 BFB cycles/chromatin bridge	Umbreit et al. 2020 Micronuclei
MN_SI_180527_S1_8_2_10_11_22_X	2	4718364	237250225	cgr	2_10_11_22_X	MN_SI_180527_S1_8	2 BFB cycles/chromatin bridge	Umbreit et al. 2020 Micronuclei
MN_SI_180527_S1_8_2_10_11_22_X	22	31497399	38596713	link	2_10_11_22_X	MN_SI_180527_S1_8	2 BFB cycles/chromatin bridge	Umbreit et al. 2020 Micronuclei
MN_SI_180527_S1_8_2_10_11_22_X	X	146550162	150237422	link	2_10_11_22_X	MN_SI_180527_S1_8	2 BFB cycles/chromatin bridge	Umbreit et al. 2020 Micronuclei
MN_SI_151120_P1_B10_2	2	466647	237628238	cgr	2	MN_SI_151120_P1_B10	4 Micronuclei	Umbreit et al. 2020 Micronuclei
MN_SI_151224_P1_G8_2	2	19121993	240198006	cgr	2	MN_SI_151224_P1_G8	4 Micronuclei	Umbreit et al. 2020 Micronuclei
MN_SI_160411_P1_I4_11	11	1414268	135064384	cgr	11	MN_SI_160411_P1_I4	3 Large loss	Umbreit et al. 2020 Micronuclei
MN_SI_160411_P2_C17_7	7	14333458	158727932	cgr	7	MN_SI_160411_P2_C17	2 BFB cycles/chromatin bridge	Umbreit et al. 2020 Micronuclei
MN_SI_160514_P1_H7_8	8	386174	144020426	cgr	8	MN_SI_160514_P1_H7	4 Micronuclei	Umbreit et al. 2020 Micronuclei
MN_SI_170724_P1_F15_1	1	7551926	247905893	cgr	1	MN_SI_170724_P1_F15	4 Micronuclei	Umbreit et al. 2020 Micronuclei
MN_SI_170724_P2_H12_4	4	69302499	177188265	cgr	4	MN_SI_170724_P2_H12	4 Micronuclei	Umbreit et al. 2020 Micronuclei
MN_SI_170724_P3_C12_1	1	182631645	215425782	cgr	1	MN_SI_170724_P3_C12	2 BFB cycles/chromatin bridge	Umbreit et al. 2020 Micronuclei
MN_SI_160316_P1_C8_1	1	9144308	244917521	cgr	1	MN_SI_160316_P1_C8	4 Micronuclei	Umbreit et al. 2020 Micronuclei
BR_SI_150402_P3_B23_4_5_6_7_10_12_15_16_18_19_X	10	60176760	129601399	link	4_5_6_7_10_12_15_16_18_19_X	BR_SI_150402_P3_B23	1 ecDNA/double minutes	Umbreit et al. 2020 Chromatin bridge
BR_SI_150402_P3_B23_4_5_6_7_10_12_15_16_18_19_X	12	33711256	86875091	link	4_5_6_7_10_12_15_16_18_19_X	BR_SI_150402_P3_B23	1 ecDNA/double minutes	Umbreit et al. 2020 Chromatin bridge
BR_SI_150402_P3_B23_4_5_6_7_10_12_15_16_18_19_X	15	54451905	54464709	link	4_5_6_7_10_12_15_16_18_19_X	BR_SI_150402_P3_B23	1 ecDNA/double minutes	Umbreit et al. 2020 Chromatin bridge
BR_SI_150402_P3_B23_4_5_6_7_10_12_15_16_18_19_X	16	72543836	83088169	link	4_5_6_7_10_12_15_16_18_19_X	BR_SI_150402_P3_B23	1 ecDNA/double minutes	Umbreit et al. 2020 Chromatin bridge
BR_SI_150402_P3_B23_4_5_6_7_10_12_15_16_18_19_X	18	2654161	15332271	link	4_5_6_7_10_12_15_16_18_19_X	BR_SI_150402_P3_B23	1 ecDNA/double minutes	Umbreit et al. 2020 Chromatin bridge
BR_SI_150402_P3_B23_4_5_6_7_10_12_15_16_18_19_X	19	2838246	2988918	link	4_5_6_7_10_12_15_16_18_19_X	BR_SI_150402_P3_B23	1 ecDNA/double minutes	Umbreit et al. 2020 Chromatin bridge
BR_SI_150402_P3_B23_4_5_6_7_10_12_15_16_18_19_X	4	46890383	177260185	cgr	4_5_6_7_10_12_15_16_18_19_X	BR_SI_150402_P3_B23	1 ecDNA/double minutes	Umbreit et al. 2020 Chromatin bridge
BR_SI_150402_P3_B23_4_5_6_7_10_12_15_16_18_19_X	5	61604791	119507935	cgr	4_5_6_7_10_12_15_16_18_19_X	BR_SI_150402_P3_B23	1 ecDNA/double minutes	Umbreit et al. 2020 Chromatin bridge
BR_SI_150402_P3_B23_4_5_6_7_10_12_15_16_18_19_X	6	77590551	103155822	link	4_5_6_7_10_12_15_16_18_19_X	BR_SI_150402_P3_B23	1 ecDNA/double minutes	Umbreit et al. 2020 Chromatin bridge
BR_SI_150402_P3_B23_4_5_6_7_10_12_15_16_18_19_X	7	13477378	126837678	link	4_5_6_7_10_12_15_16_18_19_X	BR_SI_150402_P3_B23	1 ecDNA/double minutes	Umbreit et al. 2020 Chromatin bridge
BR_SI_150402_P3_B23_4_5_6_7_10_12_15_16_18_19_X	X	20548838	155166962	cgr	4_5_6_7_10_12_15_16_18_19_X	BR_SI_150402_P3_B23	1 ecDNA/double minutes	Umbreit et al. 2020 Chromatin bridge
BR_SI_150406_P1_B4_1_2_3_4_5_6_7_8_9_10_11_12_13_14_15_16_17_18_19_20_21_22_X	1	10751165	225746852	cgr	1_2_3_4_5_6_7_8_9_10_11_12_13_14_15_16_17_18_19_20_21_22_X	BR_SI_150406_P1_B4	2 BFB cycles/chromatin bridge	Umbreit et al. 2020 Chromatin bridge
BR_SI_150406_P1_B4_1_2_3_4_5_6_7_8_9_10_11_12_13_14_15_16_17_18_19_20_21_22_X	10	21542484	126566162	cgr	1_2_3_4_5_6_7_8_9_10_11_12_13_14_15_16_17_18_19_20_21_22_X	BR_SI_150406_P1_B4	2 BFB cycles/chromatin bridge	Umbreit et al. 2020 Chromatin bridge
BR_SI_150406_P1_B4_1_2_3_4_5_6_7_8_9_10_11_12_13_14_15_16_17_18_19_20_21_22_X	11	27877991	134670634	link	1_2_3_4_5_6_7_8_9_10_11_12_13_14_15_16_17_18_19_20_21_22_X	BR_SI_150406_P1_B4	2 BFB cycles/chromatin bridge	Umbreit et al. 2020 Chromatin bridge
BR_SI_150406_P1_B4_1_2_3_4_5_6_7_8_9_10_11_12_13_14_15_16_17_18_19_20_21_22_X	12	1052159	130980687	link	1_2_3_4_5_6_7_8_9_10_11_12_13_14_15_16_17_18_19_20_21_22_X	BR_SI_150406_P1_B4	2 BFB cycles/chromatin bridge	Umbreit et al. 2020 Chromatin bridge
BR_SI_150406_P1_B4_1_2_3_4_5_6_7_8_9_10_11_12_13_14_15_16_17_18_19_20_21_22_X	13	21929097	103340171	link	1_2_3_4_5_6_7_8_9_10_11_12_13_14_15_16_17_18_19_20_21_22_X	BR_SI_150406_P1_B4	2 BFB cycles/chromatin bridge	Umbreit et al. 2020 Chromatin bridge
BR_SI_150406_P1_B4_1_2_3_4_5_6_7_8_9_10_11_12_13_14_15_16_17_18_19_20_21_22_X	14	58196953	99899555	link	1_2_3_4_5_6_7_8_9_10_11_12_13_14_15_16_17_18_19_20_21_22_X	BR_SI_150406_P1_B4	2 BFB cycles/chromatin bridge	Umbreit et al. 2020 Chromatin bridge
BR_SI_150406_P1_B4_1_2_3_4_5_6_7_8_9_10_11_12_13_14_15_16_17_18_19_20_21_22_X	15	27486300	72196206	link	1_2_3_4_5_6_7_8_9_10_11_12_13_14_15_16_17_18_19_20_21_22_X	BR_SI_150406_P1_B4	2 BFB cycles/chromatin bridge	Umbreit et al. 2020 Chromatin bridge
BR_SI_150406_P1_B4_1_2_3_4_5_6_7_8_9_10_11_12_13_14_15_16_17_18_19_20_21_22_X	16	12130269	59877150	link	1_2_3_4_5_6_7_8_9_10_11_12_13_14_15_16_17_18_19_20_21_22_X	BR_SI_150406_P1_B4	2 BFB cycles/chromatin bridge	Umbreit et al. 2020 Chromatin bridge
BR_SI_150406_P1_B4_1_2_3_4_5_6_7_8_9_10_11_12_13_14_15_16_17_18_19_20_21_22_X	17	7749348	67675876	link	1_2_3_4_5_6_7_8_9_10_11_12_13_14_15_16_17_18_19_20_21_22_X	BR_SI_150406_P1_B4	2 BFB cycles/chromatin bridge	Umbreit et al. 2020 Chromatin bridge
BR_SI_150406_P1_B4_1_2_3_4_5_6_7_8_9_10_11_12_13_14_15_16_17_18_19_20_21_22_X	18	52123307	74984869	link	1_2_3_4_5_6_7_8_9_10_11_12_13_14_15_16_17_18_19_20_21_22_X	BR_SI_150406_P1_B4	2 BFB cycles/chromatin bridge	Umbreit et al. 2020 Chromatin bridge
BR_SI_150406_P1_B4_1_2_3_4_5_6_7_8_9_10_11_12_13_14_15_16_17_18_19_20_21_22_X	19	3263357	57143285	link	1_2_3_4_5_6_7_8_9_10_11_12_13_14_15_16_17_18_19_20_21_22_X	BR_SI_150406_P1_B4	2 BFB cycles/chromatin bridge	Umbreit et al. 2020 Chromatin bridge
BR_SI_150406_P1_B4_1_2_3_4_5_6_7_8_9_10_11_12_13_14_15_16_17_18_19_20_21_22_X	2	97001228	223565901	link	1_2_3_4_5_6_7_8_9_10_11_12_13_14_15_16_17_18_19_20_21_22_X	BR_SI_150406_P1_B4	2 BFB cycles/chromatin bridge	Umbreit et al. 2020 Chromatin bridge
BR_SI_150406_P1_B4_1_2_3_4_5_6_7_8_9_10_11_12_13_14_15_16_17_18_19_20_21_22_X	20	23206710	62178654	link	1_2_3_4_5_6_7_8_9_10_11_12_13_14_15_16_17_18_19_20_21_22_X	BR_SI_150406_P1_B4	2 BFB cycles/chromatin bridge	Umbreit et al. 2020 Chromatin bridge
BR_SI_150406_P1_B4_1_2_3_4_5_6_7_8_9_10_11_12_13_14_15_16_17_18_19_20_21_22_X	21	5225938	42867758	link	1_2_3_4_5_6_7_8_9_10_11_12_13_14_15_16_17_18_19_20_21_22_X	BR_SI_150406_P1_B4	2 BFB cycles/chromatin bridge	Umbreit et al. 2020 Chromatin bridge
BR_SI_150406_P1_B4_1_2_3_4_5_6_7_8_9_10_11_12_13_14_15_16_17_18_19_20_21_22_X	22	34337016	41077376	link	1_2_3_4_5_6_7_8_9_10_11_12_13_14_15_16_17_18_19_20_21_22_X	BR_SI_150406_P1_B4	2 BFB cycles/chromatin bridge	Umbreit et al. 2020 Chromatin bridge
BR_SI_150406_P1_B4_1_2_3_4_5_6_7_8_9_10_11_12_13_14_15_16_17_18_19_20_21_22_X	3	44186178	194993933	cgr	1_2_3_4_5_6_7_8_9_10_11_12_13_14_15_16_17_18_19_20_21_22_X	BR_SI_150406_P1_B4	2 BFB cycles/chromatin bridge	Umbreit et al. 2020 Chromatin bridge
BR_SI_150406_P1_B4_1_2_3_4_5_6_7_8_9_10_11_12_13_14_15_16_17_18_19_20_21_22_X	4	9079063	182828704	link	1_2_3_4_5_6_7_8_9_10_11_12_13_14_15_16_17_18_19_20_21_22_X	BR_SI_150406_P1_B4	2 BFB cycles/chromatin bridge	Umbreit et al. 2020 Chromatin bridge
BR_SI_150406_P1_B4_1_2_3_4_5_6_7_8_9_10_11_12_13_14_15_16_17_18_19_20_21_22_X	5	4958449	177515589	link	1_2_3_4_5_6_7_8_9_10_11_12_13_14_15_16_17_18_19_20_21_22_X	BR_SI_150406_P1_B4	2 BFB cycles/chromatin bridge	Umbreit et al. 2020 Chromatin bridge
BR_SI_150406_P1_B4_1_2_3_4_5_6_7_8_9_10_11_12_13_14_15_16_17_18_19_20_21_22_X	6	1511839	169253241	link	1_2_3_4_5_6_7_8_9_10_11_12_13_14_15_16_17_18_19_20_21_22_X	BR_SI_150406_P1_B4	2 BFB cycles/chromatin bridge	Umbreit et al. 2020 Chromatin bridge
BR_SI_150406_P1_B4_1_2_3_4_5_6_7_8_9_10_11_12_13_14_15_16_17_18_19_20_21_22_X	7	365762	107183984	link	1_2_3_4_5_6_7_8_9_10_11_12_13_14_15_16_17_18_19_20_21_22_X	BR_SI_150406_P1_B4	2 BFB cycles/chromatin bridge	Umbreit et al. 2020 Chromatin bridge
BR_SI_150406_P1_B4_1_2_3_4_5_6_7_8_9_10_11_12_13_14_15_16_17_18_19_20_21_22_X	8	3350016	143283143	link	1_2_3_4_5_6_7_8_9_10_11_12_13_14_15_16_17_18_19_20_21_22_X	BR_SI_150406_P1_B4	2 BFB cycles/chromatin bridge	Umbreit et al. 2020 Chromatin bridge
BR_SI_150406_P1_B4_1_2_3_4_5_6_7_8_9_10_11_12_13_14_15_16_17_18_19_20_21_22_X	9	8385793	132176125	link	1_2_3_4_5_6_7_8_9_10_11_12_13_14_15_16_17_18_19_20_21_22_X	BR_SI_150406_P1_B4	2 BFB cycles/chromatin bridge	Umbreit et al. 2020 Chromatin bridge
BR_SI_150406_P1_B4_1_2_3_4_5_6_7_8_9_10_11_12_13_14_15_16_17_18_19_20_21_22_X	X	66760389	140487407	cgr	1_2_3_4_5_6_7_8_9_10_11_12_13_14_15_16_17_18_19_20_21_22_X	BR_SI_150406_P1_B4	2 BFB cycles/chromatin bridge	Umbreit et al. 2020 Chromatin bridge
BR_SI_150406_P3_E1_16_18	16	19346342	30983196	cgr	16_18	BR_SI_150406_P3_E1	3 Large loss	Umbreit et al. 2020 Chromatin bridge
BR_SI_150406_P3_E1_16_18	18	14122269	15339992	link	16_18	BR_SI_150406_P3_E1	3 Large loss	Umbreit et al. 2020 Chromatin bridge
BR_SI_150406_P3_E3_2_9_16_18	16	10247993	24821604	cgr	2_9_16_18	BR_SI_150406_P3_E3	2 BFB cycles/chromatin bridge	Umbreit et al. 2020 Chromatin bridge
BR_SI_150406_P3_E3_2_9_16_18	18	14070599	15364296	link	2_9_16_18	BR_SI_150406_P3_E3	2 BFB cycles/chromatin bridge	Umbreit et al. 2020 Chromatin bridge
BR_SI_150406_P3_E3_2_9_16_18	2	94540699	94540979	link	2_9_16_18	BR_SI_150406_P3_E3	2 BFB cycles/chromatin bridge	Umbreit et al. 2020 Chromatin bridge
BR_SI_150406_P3_E3_2_9_16_18	9	40552063	43186382	link	2_9_16_18	BR_SI_150406_P3_E3	2 BFB cycles/chromatin bridge	Umbreit et al. 2020 Chromatin bridge
BR_SI_150406_Q2_C3_1_2_3_4_5_6_7_8_9_10_11_12_14_16_17_18_19_20_22_X	1	1811329	118395681	link	1_2_3_4_5_6_7_8_9_10_11_12_14_16_17_18_19_20_22_X	BR_SI_150406_Q2_C3	2 BFB cycles/chromatin bridge	Umbreit et al. 2020 Chromatin bridge
BR_SI_150406_Q2_C3_1_2_3_4_5_6_7_8_9_10_11_12_14_16_17_18_19_20_22_X	10	225376	128133828	link	1_2_3_4_5_6_7_8_9_10_11_12_14_16_17_18_19_20_22_X	BR_SI_150406_Q2_C3	2 BFB cycles/chromatin bridge	Umbreit et al. 2020 Chromatin bridge
BR_SI_150406_Q2_C3_1_2_3_4_5_6_7_8_9_10_11_12_14_16_17_18_19_20_22_X	11	18500065	133890447	link	1_2_3_4_5_6_7_8_9_10_11_12_14_16_17_18_19_20_22_X	BR_SI_150406_Q2_C3	2 BFB cycles/chromatin bridge	Umbreit et al. 2020 Chromatin bridge
BR_SI_150406_Q2_C3_1_2_3_4_5_6_7_8_9_10_11_12_14_16_17_18_19_20_22_X	12	83293371	120981367	link	1_2_3_4_5_6_7_8_9_10_11_12_14_16_17_18_19_20_22_X	BR_SI_150406_Q2_C3	2 BFB cycles/chromatin bridge	Umbreit et al. 2020 Chromatin bridge
BR_SI_150406_Q2_C3_1_2_3_4_5_6_7_8_9_10_11_12_14_16_17_18_19_20_22_X	14	30635236	93246534	link	1_2_3_4_5_6_7_8_9_10_11_12_14_16_17_18_19_20_22_X	BR_SI_150406_Q2_C3	2 BFB cycles/chromatin bridge	Umbreit et al. 2020 Chromatin bridge
BR_SI_150406_Q2_C3_1_2_3_4_5_6_7_8_9_10_11_12_14_16_17_18_19_20_22_X	16	50007078	86423460	link	1_2_3_4_5_6_7_8_9_10_11_12_14_16_17_18_19_20_22_X	BR_SI_150406_Q2_C3	2 BFB cycles/chromatin bridge	Umbreit et al. 2020 Chromatin bridge
BR_SI_150406_Q2_C3_1_2_3_4_5_6_7_8_9_10_11_12_14_16_17_18_19_20_22_X	17	799416	80651963	cgr	1_2_3_4_5_6_7_8_9_10_11_12_14_16_17_18_19_20_22_X	BR_SI_150406_Q2_C3	2 BFB cycles/chromatin bridge	Umbreit et al. 2020 Chromatin bridge
BR_SI_150406_Q2_C3_1_2_3_4_5_6_7_8_9_10_11_12_14_16_17_18_19_20_22_X	18	3374703	64894873	link	1_2_3_4_5_6_7_8_9_10_11_12_14_16_17_18_19_20_22_X	BR_SI_150406_Q2_C3	2 BFB cycles/chromatin bridge	Umbreit et al. 2020 Chromatin bridge
BR_SI_150406_Q2_C3_1_2_3_4_5_6_7_8_9_10_11_12_14_16_17_18_19_20_22_X	19	18630463	48403919	link	1_2_3_4_5_6_7_8_9_10_11_12_14_16_17_18_19_20_22_X	BR_SI_150406_Q2_C3	2 BFB cycles/chromatin bridge	Umbreit et al. 2020 Chromatin bridge
BR_SI_150406_Q2_C3_1_2_3_4_5_6_7_8_9_10_11_12_14_16_17_18_19_20_22_X	2	4654353	96351837	link	1_2_3_4_5_6_7_8_9_10_11_12_14_16_17_18_19_20_22_X	BR_SI_150406_Q2_C3	2 BFB cycles/chromatin bridge	Umbreit et al. 2020 Chromatin bridge
BR_SI_150406_Q2_C3_1_2_3_4_5_6_7_8_9_10_11_12_14_16_17_18_19_20_22_X	20	429028	62267327	link	1_2_3_4_5_6_7_8_9_10_11_12_14_16_17_18_19_20_22_X	BR_SI_150406_Q2_C3	2 BFB cycles/chromatin bridge	Umbreit et al. 2020 Chromatin bridge
BR_SI_150406_Q2_C3_1_2_3_4_5_6_7_8_9_10_11_12_14_16_17_18_19_20_22_X	22	29364652	42820135	link	1_2_3_4_5_6_7_8_9_10_11_12_14_16_17_18_19_20_22_X	BR_SI_150406_Q2_C3	2 BFB cycles/chromatin bridge	Umbreit et al. 2020 Chromatin bridge
BR_SI_150406_Q2_C3_1_2_3_4_5_6_7_8_9_10_11_12_14_16_17_18_19_20_22_X	3	3316351	177311517	cgr	1_2_3_4_5_6_7_8_9_10_11_12_14_16_17_18_19_20_22_X	BR_SI_150406_Q2_C3	2 BFB cycles/chromatin bridge	Umbreit et al. 2020 Chromatin bridge
BR_SI_150406_Q2_C3_1_2_3_4_5_6_7_8_9_10_11_12_14_16_17_18_19_20_22_X	4	4298647	177179489	link	1_2_3_4_5_6_7_8_9_10_11_12_14_16_17_18_19_20_22_X	BR_SI_150406_Q2_C3	2 BFB cycles/chromatin bridge	Umbreit et al. 2020 Chromatin bridge
BR_SI_150406_Q2_C3_1_2_3_4_5_6_7_8_9_10_11_12_14_16_17_18_19_20_22_X	5	32097440	160377604	link	1_2_3_4_5_6_7_8_9_10_11_12_14_16_17_18_19_20_22_X	BR_SI_150406_Q2_C3	2 BFB cycles/chromatin bridge	Umbreit et al. 2020 Chromatin bridge
BR_SI_150406_Q2_C3_1_2_3_4_5_6_7_8_9_10_11_12_14_16_17_18_19_20_22_X	6	130228818	156191397	link	1_2_3_4_5_6_7_8_9_10_11_12_14_16_17_18_19_20_22_X	BR_SI_150406_Q2_C3	2 BFB cycles/chromatin bridge	Umbreit et al. 2020 Chromatin bridge
BR_SI_150406_Q2_C3_1_2_3_4_5_6_7_8_9_10_11_12_14_16_17_18_19_20_22_X	7	44570375	47119929	link	1_2_3_4_5_6_7_8_9_10_11_12_14_16_17_18_19_20_22_X	BR_SI_150406_Q2_C3	2 BFB cycles/chromatin bridge	Umbreit et al. 2020 Chromatin bridge
BR_SI_150406_Q2_C3_1_2_3_4_5_6_7_8_9_10_11_12_14_16_17_18_19_20_22_X	8	6634141	138036027	cgr	1_2_3_4_5_6_7_8_9_10_11_12_14_16_17_18_19_20_22_X	BR_SI_150406_Q2_C3	2 BFB cycles/chromatin bridge	Umbreit et al. 2020 Chromatin bridge
BR_SI_150406_Q2_C3_1_2_3_4_5_6_7_8_9_10_11_12_14_16_17_18_19_20_22_X	9	36254732	121786487	link	1_2_3_4_5_6_7_8_9_10_11_12_14_16_17_18_19_20_22_X	BR_SI_150406_Q2_C3	2 BFB cycles/chromatin bridge	Umbreit et al. 2020 Chromatin bridge
BR_SI_150406_Q2_C3_1_2_3_4_5_6_7_8_9_10_11_12_14_16_17_18_19_20_22_X	X	9738074	142379719	link	1_2_3_4_5_6_7_8_9_10_11_12_14_16_17_18_19_20_22_X	BR_SI_150406_Q2_C3	2 BFB cycles/chromatin bridge	Umbreit et al. 2020 Chromatin bridge
BR_SI_160611_P1_D9_1_17_18	1	84890043	84890471	link	1_17_18	BR_SI_160611_P1_D9	2 BFB cycles/chromatin bridge	Umbreit et al. 2020 Chromatin bridge
BR_SI_160611_P1_D9_1_17_18	17	69218841	82729013	cgr	1_17_18	BR_SI_160611_P1_D9	2 BFB cycles/chromatin bridge	Umbreit et al. 2020 Chromatin bridge
BR_SI_160611_P1_D9_1_17_18	18	39494250	76995157	link	1_17_18	BR_SI_160611_P1_D9	2 BFB cycles/chromatin bridge	Umbreit et al. 2020 Chromatin bridge
BR_SI_160707_P1_G9_2_9	2	19630579	222954637	cgr	2_9	BR_SI_160707_P1_G9	2 BFB cycles/chromatin bridge	Umbreit et al. 2020 Chromatin bridge
BR_SI_160707_P1_G9_2_9	9	96362186	99213456	link	2_9	BR_SI_160707_P1_G9	2 BFB cycles/chromatin bridge	Umbreit et al. 2020 Chromatin bridge
BR_SI_160707_P2_K9_1_3_11_12_16_20_21	1	57086649	160526279	link	1_3_11_12_16_20_21	BR_SI_160707_P2_K9	2 BFB cycles/chromatin bridge	Umbreit et al. 2020 Chromatin bridge
BR_SI_160707_P2_K9_1_3_11_12_16_20_21	11	115094026	125997975	link	1_3_11_12_16_20_21	BR_SI_160707_P2_K9	2 BFB cycles/chromatin bridge	Umbreit et al. 2020 Chromatin bridge
BR_SI_160707_P2_K9_1_3_11_12_16_20_21	12	9390450	16722707	link	1_3_11_12_16_20_21	BR_SI_160707_P2_K9	2 BFB cycles/chromatin bridge	Umbreit et al. 2020 Chromatin bridge
BR_SI_160707_P2_K9_1_3_11_12_16_20_21	16	8394350	61086986	link	1_3_11_12_16_20_21	BR_SI_160707_P2_K9	2 BFB cycles/chromatin bridge	Umbreit et al. 2020 Chromatin bridge
BR_SI_160707_P2_K9_1_3_11_12_16_20_21	20	1730127	63706005	link	1_3_11_12_16_20_21	BR_SI_160707_P2_K9	2 BFB cycles/chromatin bridge	Umbreit et al. 2020 Chromatin bridge
BR_SI_160707_P2_K9_1_3_11_12_16_20_21	21	39691775	40453092	link	1_3_11_12_16_20_21	BR_SI_160707_P2_K9	2 BFB cycles/chromatin bridge	Umbreit et al. 2020 Chromatin bridge
BR_SI_160707_P2_K9_1_3_11_12_16_20_21	3	11676397	62506317	cgr	1_3_11_12_16_20_21	BR_SI_160707_P2_K9	2 BFB cycles/chromatin bridge	Umbreit et al. 2020 Chromatin bridge
BR_SI_181003_P4_L11_1_2_3_4_5_6_7_8_9_10_11_12_13_14_15_16_17_18_19_20_21_22_X	1	4865072	242021672	cgr	1_2_3_4_5_6_7_8_9_10_11_12_13_14_15_16_17_18_19_20_21_22_X	BR_SI_181003_P4_L11	2 BFB cycles/chromatin bridge	Umbreit et al. 2020 Chromatin bridge
BR_SI_181003_P4_L11_1_2_3_4_5_6_7_8_9_10_11_12_13_14_15_16_17_18_19_20_21_22_X	10	1861531	127965780	cgr	1_2_3_4_5_6_7_8_9_10_11_12_13_14_15_16_17_18_19_20_21_22_X	BR_SI_181003_P4_L11	2 BFB cycles/chromatin bridge	Umbreit et al. 2020 Chromatin bridge
BR_SI_181003_P4_L11_1_2_3_4_5_6_7_8_9_10_11_12_13_14_15_16_17_18_19_20_21_22_X	11	15996019	131835301	link	1_2_3_4_5_6_7_8_9_10_11_12_13_14_15_16_17_18_19_20_21_22_X	BR_SI_181003_P4_L11	2 BFB cycles/chromatin bridge	Umbreit et al. 2020 Chromatin bridge
BR_SI_181003_P4_L11_1_2_3_4_5_6_7_8_9_10_11_12_13_14_15_16_17_18_19_20_21_22_X	12	89334	130980489	link	1_2_3_4_5_6_7_8_9_10_11_12_13_14_15_16_17_18_19_20_21_22_X	BR_SI_181003_P4_L11	2 BFB cycles/chromatin bridge	Umbreit et al. 2020 Chromatin bridge
BR_SI_181003_P4_L11_1_2_3_4_5_6_7_8_9_10_11_12_13_14_15_16_17_18_19_20_21_22_X	13	21929009	105573922	link	1_2_3_4_5_6_7_8_9_10_11_12_13_14_15_16_17_18_19_20_21_22_X	BR_SI_181003_P4_L11	2 BFB cycles/chromatin bridge	Umbreit et al. 2020 Chromatin bridge
BR_SI_181003_P4_L11_1_2_3_4_5_6_7_8_9_10_11_12_13_14_15_16_17_18_19_20_21_22_X	14	27660689	64078760	link	1_2_3_4_5_6_7_8_9_10_11_12_13_14_15_16_17_18_19_20_21_22_X	BR_SI_181003_P4_L11	2 BFB cycles/chromatin bridge	Umbreit et al. 2020 Chromatin bridge
BR_SI_181003_P4_L11_1_2_3_4_5_6_7_8_9_10_11_12_13_14_15_16_17_18_19_20_21_22_X	15	27872671	98148402	link	1_2_3_4_5_6_7_8_9_10_11_12_13_14_15_16_17_18_19_20_21_22_X	BR_SI_181003_P4_L11	2 BFB cycles/chromatin bridge	Umbreit et al. 2020 Chromatin bridge
BR_SI_181003_P4_L11_1_2_3_4_5_6_7_8_9_10_11_12_13_14_15_16_17_18_19_20_21_22_X	16	24759820	89737458	link	1_2_3_4_5_6_7_8_9_10_11_12_13_14_15_16_17_18_19_20_21_22_X	BR_SI_181003_P4_L11	2 BFB cycles/chromatin bridge	Umbreit et al. 2020 Chromatin bridge
BR_SI_181003_P4_L11_1_2_3_4_5_6_7_8_9_10_11_12_13_14_15_16_17_18_19_20_21_22_X	17	312568	79987535	link	1_2_3_4_5_6_7_8_9_10_11_12_13_14_15_16_17_18_19_20_21_22_X	BR_SI_181003_P4_L11	2 BFB cycles/chromatin bridge	Umbreit et al. 2020 Chromatin bridge
BR_SI_181003_P4_L11_1_2_3_4_5_6_7_8_9_10_11_12_13_14_15_16_17_18_19_20_21_22_X	18	11313377	62436026	link	1_2_3_4_5_6_7_8_9_10_11_12_13_14_15_16_17_18_19_20_21_22_X	BR_SI_181003_P4_L11	2 BFB cycles/chromatin bridge	Umbreit et al. 2020 Chromatin bridge
BR_SI_181003_P4_L11_1_2_3_4_5_6_7_8_9_10_11_12_13_14_15_16_17_18_19_20_21_22_X	19	3042523	54246427	link	1_2_3_4_5_6_7_8_9_10_11_12_13_14_15_16_17_18_19_20_21_22_X	BR_SI_181003_P4_L11	2 BFB cycles/chromatin bridge	Umbreit et al. 2020 Chromatin bridge
BR_SI_181003_P4_L11_1_2_3_4_5_6_7_8_9_10_11_12_13_14_15_16_17_18_19_20_21_22_X	2	5204069	227837244	link	1_2_3_4_5_6_7_8_9_10_11_12_13_14_15_16_17_18_19_20_21_22_X	BR_SI_181003_P4_L11	2 BFB cycles/chromatin bridge	Umbreit et al. 2020 Chromatin bridge
BR_SI_181003_P4_L11_1_2_3_4_5_6_7_8_9_10_11_12_13_14_15_16_17_18_19_20_21_22_X	20	5527485	51923477	link	1_2_3_4_5_6_7_8_9_10_11_12_13_14_15_16_17_18_19_20_21_22_X	BR_SI_181003_P4_L11	2 BFB cycles/chromatin bridge	Umbreit et al. 2020 Chromatin bridge
BR_SI_181003_P4_L11_1_2_3_4_5_6_7_8_9_10_11_12_13_14_15_16_17_18_19_20_21_22_X	21	14055713	45075553	link	1_2_3_4_5_6_7_8_9_10_11_12_13_14_15_16_17_18_19_20_21_22_X	BR_SI_181003_P4_L11	2 BFB cycles/chromatin bridge	Umbreit et al. 2020 Chromatin bridge
BR_SI_181003_P4_L11_1_2_3_4_5_6_7_8_9_10_11_12_13_14_15_16_17_18_19_20_21_22_X	22	19139927	22896102	link	1_2_3_4_5_6_7_8_9_10_11_12_13_14_15_16_17_18_19_20_21_22_X	BR_SI_181003_P4_L11	2 BFB cycles/chromatin bridge	Umbreit et al. 2020 Chromatin bridge
BR_SI_181003_P4_L11_1_2_3_4_5_6_7_8_9_10_11_12_13_14_15_16_17_18_19_20_21_22_X	3	2687435	193042108	link	1_2_3_4_5_6_7_8_9_10_11_12_13_14_15_16_17_18_19_20_21_22_X	BR_SI_181003_P4_L11	2 BFB cycles/chromatin bridge	Umbreit et al. 2020 Chromatin bridge
BR_SI_181003_P4_L11_1_2_3_4_5_6_7_8_9_10_11_12_13_14_15_16_17_18_19_20_21_22_X	4	6651749	185779951	cgr	1_2_3_4_5_6_7_8_9_10_11_12_13_14_15_16_17_18_19_20_21_22_X	BR_SI_181003_P4_L11	2 BFB cycles/chromatin bridge	Umbreit et al. 2020 Chromatin bridge
BR_SI_181003_P4_L11_1_2_3_4_5_6_7_8_9_10_11_12_13_14_15_16_17_18_19_20_21_22_X	5	89161	181125766	cgr	1_2_3_4_5_6_7_8_9_10_11_12_13_14_15_16_17_18_19_20_21_22_X	BR_SI_181003_P4_L11	2 BFB cycles/chromatin bridge	Umbreit et al. 2020 Chromatin bridge
BR_SI_181003_P4_L11_1_2_3_4_5_6_7_8_9_10_11_12_13_14_15_16_17_18_19_20_21_22_X	6	14519932	162578626	link	1_2_3_4_5_6_7_8_9_10_11_12_13_14_15_16_17_18_19_20_21_22_X	BR_SI_181003_P4_L11	2 BFB cycles/chromatin bridge	Umbreit et al. 2020 Chromatin bridge
BR_SI_181003_P4_L11_1_2_3_4_5_6_7_8_9_10_11_12_13_14_15_16_17_18_19_20_21_22_X	7	1753067	158959315	link	1_2_3_4_5_6_7_8_9_10_11_12_13_14_15_16_17_18_19_20_21_22_X	BR_SI_181003_P4_L11	2 BFB cycles/chromatin bridge	Umbreit et al. 2020 Chromatin bridge
BR_SI_181003_P4_L11_1_2_3_4_5_6_7_8_9_10_11_12_13_14_15_16_17_18_19_20_21_22_X	8	8850834	140676892	cgr	1_2_3_4_5_6_7_8_9_10_11_12_13_14_15_16_17_18_19_20_21_22_X	BR_SI_181003_P4_L11	2 BFB cycles/chromatin bridge	Umbreit et al. 2020 Chromatin bridge
BR_SI_181003_P4_L11_1_2_3_4_5_6_7_8_9_10_11_12_13_14_15_16_17_18_19_20_21_22_X	9	2758827	134570674	cgr	1_2_3_4_5_6_7_8_9_10_11_12_13_14_15_16_17_18_19_20_21_22_X	BR_SI_181003_P4_L11	2 BFB cycles/chromatin bridge	Umbreit et al. 2020 Chromatin bridge
BR_SI_181003_P4_L11_1_2_3_4_5_6_7_8_9_10_11_12_13_14_15_16_17_18_19_20_21_22_X	X	17402570	122904744	link	1_2_3_4_5_6_7_8_9_10_11_12_13_14_15_16_17_18_19_20_21_22_X	BR_SI_181003_P4_L11	2 BFB cycles/chromatin bridge	Umbreit et al. 2020 Chromatin bridge
BR_SI_190304_P1_2LA_1_2_3_4_5_6_7_8_9_10_11_12_13_14_15_16_17_19_20_21_22_X	1	1656449	245791953	link	1_2_3_4_5_6_7_8_9_10_11_12_13_14_15_16_17_19_20_21_22_X	BR_SI_190304_P1_2LA	2 BFB cycles/chromatin bridge	Umbreit et al. 2020 Chromatin bridge
BR_SI_190304_P1_2LA_1_2_3_4_5_6_7_8_9_10_11_12_13_14_15_16_17_19_20_21_22_X	10	6706430	122342212	link	1_2_3_4_5_6_7_8_9_10_11_12_13_14_15_16_17_19_20_21_22_X	BR_SI_190304_P1_2LA	2 BFB cycles/chromatin bridge	Umbreit et al. 2020 Chromatin bridge
BR_SI_190304_P1_2LA_1_2_3_4_5_6_7_8_9_10_11_12_13_14_15_16_17_19_20_21_22_X	11	27256119	127907553	link	1_2_3_4_5_6_7_8_9_10_11_12_13_14_15_16_17_19_20_21_22_X	BR_SI_190304_P1_2LA	2 BFB cycles/chromatin bridge	Umbreit et al. 2020 Chromatin bridge
BR_SI_190304_P1_2LA_1_2_3_4_5_6_7_8_9_10_11_12_13_14_15_16_17_19_20_21_22_X	12	11142855	127090094	link	1_2_3_4_5_6_7_8_9_10_11_12_13_14_15_16_17_19_20_21_22_X	BR_SI_190304_P1_2LA	2 BFB cycles/chromatin bridge	Umbreit et al. 2020 Chromatin bridge
BR_SI_190304_P1_2LA_1_2_3_4_5_6_7_8_9_10_11_12_13_14_15_16_17_19_20_21_22_X	13	44920052	111879473	link	1_2_3_4_5_6_7_8_9_10_11_12_13_14_15_16_17_19_20_21_22_X	BR_SI_190304_P1_2LA	2 BFB cycles/chromatin bridge	Umbreit et al. 2020 Chromatin bridge
BR_SI_190304_P1_2LA_1_2_3_4_5_6_7_8_9_10_11_12_13_14_15_16_17_19_20_21_22_X	14	31110106	103790775	link	1_2_3_4_5_6_7_8_9_10_11_12_13_14_15_16_17_19_20_21_22_X	BR_SI_190304_P1_2LA	2 BFB cycles/chromatin bridge	Umbreit et al. 2020 Chromatin bridge
BR_SI_190304_P1_2LA_1_2_3_4_5_6_7_8_9_10_11_12_13_14_15_16_17_19_20_21_22_X	15	24102760	83527319	link	1_2_3_4_5_6_7_8_9_10_11_12_13_14_15_16_17_19_20_21_22_X	BR_SI_190304_P1_2LA	2 BFB cycles/chromatin bridge	Umbreit et al. 2020 Chromatin bridge
BR_SI_190304_P1_2LA_1_2_3_4_5_6_7_8_9_10_11_12_13_14_15_16_17_19_20_21_22_X	16	30045356	79860770	link	1_2_3_4_5_6_7_8_9_10_11_12_13_14_15_16_17_19_20_21_22_X	BR_SI_190304_P1_2LA	2 BFB cycles/chromatin bridge	Umbreit et al. 2020 Chromatin bridge
BR_SI_190304_P1_2LA_1_2_3_4_5_6_7_8_9_10_11_12_13_14_15_16_17_19_20_21_22_X	17	2449436	75373856	link	1_2_3_4_5_6_7_8_9_10_11_12_13_14_15_16_17_19_20_21_22_X	BR_SI_190304_P1_2LA	2 BFB cycles/chromatin bridge	Umbreit et al. 2020 Chromatin bridge
BR_SI_190304_P1_2LA_1_2_3_4_5_6_7_8_9_10_11_12_13_14_15_16_17_19_20_21_22_X	19	8926646	39960610	link	1_2_3_4_5_6_7_8_9_10_11_12_13_14_15_16_17_19_20_21_22_X	BR_SI_190304_P1_2LA	2 BFB cycles/chromatin bridge	Umbreit et al. 2020 Chromatin bridge
BR_SI_190304_P1_2LA_1_2_3_4_5_6_7_8_9_10_11_12_13_14_15_16_17_19_20_21_22_X	2	15249677	200531691	cgr	1_2_3_4_5_6_7_8_9_10_11_12_13_14_15_16_17_19_20_21_22_X	BR_SI_190304_P1_2LA	2 BFB cycles/chromatin bridge	Umbreit et al. 2020 Chromatin bridge
BR_SI_190304_P1_2LA_1_2_3_4_5_6_7_8_9_10_11_12_13_14_15_16_17_19_20_21_22_X	20	24240900	40309204	link	1_2_3_4_5_6_7_8_9_10_11_12_13_14_15_16_17_19_20_21_22_X	BR_SI_190304_P1_2LA	2 BFB cycles/chromatin bridge	Umbreit et al. 2020 Chromatin bridge
BR_SI_190304_P1_2LA_1_2_3_4_5_6_7_8_9_10_11_12_13_14_15_16_17_19_20_21_22_X	21	23878322	39559958	link	1_2_3_4_5_6_7_8_9_10_11_12_13_14_15_16_17_19_20_21_22_X	BR_SI_190304_P1_2LA	2 BFB cycles/chromatin bridge	Umbreit et al. 2020 Chromatin bridge
BR_SI_190304_P1_2LA_1_2_3_4_5_6_7_8_9_10_11_12_13_14_15_16_17_19_20_21_22_X	22	29868860	32692162	link	1_2_3_4_5_6_7_8_9_10_11_12_13_14_15_16_17_19_20_21_22_X	BR_SI_190304_P1_2LA	2 BFB cycles/chromatin bridge	Umbreit et al. 2020 Chromatin bridge
BR_SI_190304_P1_2LA_1_2_3_4_5_6_7_8_9_10_11_12_13_14_15_16_17_19_20_21_22_X	3	825363	196758673	link	1_2_3_4_5_6_7_8_9_10_11_12_13_14_15_16_17_19_20_21_22_X	BR_SI_190304_P1_2LA	2 BFB cycles/chromatin bridge	Umbreit et al. 2020 Chromatin bridge
BR_SI_190304_P1_2LA_1_2_3_4_5_6_7_8_9_10_11_12_13_14_15_16_17_19_20_21_22_X	4	2879860	164826639	link	1_2_3_4_5_6_7_8_9_10_11_12_13_14_15_16_17_19_20_21_22_X	BR_SI_190304_P1_2LA	2 BFB cycles/chromatin bridge	Umbreit et al. 2020 Chromatin bridge
BR_SI_190304_P1_2LA_1_2_3_4_5_6_7_8_9_10_11_12_13_14_15_16_17_19_20_21_22_X	5	14548458	162802492	link	1_2_3_4_5_6_7_8_9_10_11_12_13_14_15_16_17_19_20_21_22_X	BR_SI_190304_P1_2LA	2 BFB cycles/chromatin bridge	Umbreit et al. 2020 Chromatin bridge
BR_SI_190304_P1_2LA_1_2_3_4_5_6_7_8_9_10_11_12_13_14_15_16_17_19_20_21_22_X	6	15359928	161944642	link	1_2_3_4_5_6_7_8_9_10_11_12_13_14_15_16_17_19_20_21_22_X	BR_SI_190304_P1_2LA	2 BFB cycles/chromatin bridge	Umbreit et al. 2020 Chromatin bridge
BR_SI_190304_P1_2LA_1_2_3_4_5_6_7_8_9_10_11_12_13_14_15_16_17_19_20_21_22_X	7	692382	151986472	link	1_2_3_4_5_6_7_8_9_10_11_12_13_14_15_16_17_19_20_21_22_X	BR_SI_190304_P1_2LA	2 BFB cycles/chromatin bridge	Umbreit et al. 2020 Chromatin bridge
BR_SI_190304_P1_2LA_1_2_3_4_5_6_7_8_9_10_11_12_13_14_15_16_17_19_20_21_22_X	8	22898385	144741380	link	1_2_3_4_5_6_7_8_9_10_11_12_13_14_15_16_17_19_20_21_22_X	BR_SI_190304_P1_2LA	2 BFB cycles/chromatin bridge	Umbreit et al. 2020 Chromatin bridge
BR_SI_190304_P1_2LA_1_2_3_4_5_6_7_8_9_10_11_12_13_14_15_16_17_19_20_21_22_X	9	2926361	87540873	link	1_2_3_4_5_6_7_8_9_10_11_12_13_14_15_16_17_19_20_21_22_X	BR_SI_190304_P1_2LA	2 BFB cycles/chromatin bridge	Umbreit et al. 2020 Chromatin bridge
BR_SI_190304_P1_2LA_1_2_3_4_5_6_7_8_9_10_11_12_13_14_15_16_17_19_20_21_22_X	X	3228315	126193777	link	1_2_3_4_5_6_7_8_9_10_11_12_13_14_15_16_17_19_20_21_22_X	BR_SI_190304_P1_2LA	2 BFB cycles/chromatin bridge	Umbreit et al. 2020 Chromatin bridge
BR_SI_160316_P1_G6_3	3	167940132	182113894	cgr	3	BR_SI_160316_P1_G6	2 BFB cycles/chromatin bridge	Umbreit et al. 2020 Chromatin bridge
BR_SI_160416_Q1_N12_4	4	118572953	136610730	cgr	4	BR_SI_160416_Q1_N12	6 Hourglass	Umbreit et al. 2020 Chromatin bridge
BR_SI_160422_Q1_F7_3	3	191081640	197614605	cgr	3	BR_SI_160422_Q1_F7	2 BFB cycles/chromatin bridge	Umbreit et al. 2020 Chromatin bridge
BR_SI_160422_Q1_F9_3	3	191085667	197384392	cgr	3	BR_SI_160422_Q1_F9	2 BFB cycles/chromatin bridge	Umbreit et al. 2020 Chromatin bridge
BR_SI_160803_P1_O3_2	2	20797224	63525893	cgr	2	BR_SI_160803_P1_O3	4 Micronuclei	Umbreit et al. 2020 Chromatin bridge
BR_SI_160803_P1_O5_3	3	7027003	26536595	cgr	3	BR_SI_160803_P1_O5	5 Large gain	Umbreit et al. 2020 Chromatin bridge
BR_SI_181113_P6_1LA_4	4	2934092	17858649	cgr	4	BR_SI_181113_P6_1LA	5 Large gain	Umbreit et al. 2020 Chromatin bridge
BR_SI_181113_P6_1LB_4	4	1255696	11306579	cgr	4	BR_SI_181113_P6_1LB	5 Large gain	Umbreit et al. 2020 Chromatin bridge
BR_SI_160416_Q1_N10_1	1	44878857	246977414	cgr	1	BR_SI_160416_Q1_N10	2 BFB cycles/chromatin bridge	Umbreit et al. 2020 Chromatin bridge
